1           **Phylodynamics and migration data help describe HIV transmission dynamics in**  
2           **internally displaced people who inject drugs in Ukraine**

3  
4 Ganna Kovalenko<sup>1,2,#</sup>, Anna Yakovleva<sup>3,#</sup>, Pavlo Smyrnov<sup>4</sup>, Matthew Redlinger<sup>2</sup>, Olga  
5 Tymets<sup>4</sup>, Anna Korobchuk<sup>4</sup>, Anna Kolodiazieva<sup>5</sup>, Anna Podolina<sup>5</sup>, Svitlana Cherniavska<sup>5</sup>, Britt  
6 Skaathun<sup>6</sup>, Laramie R. Smith<sup>6</sup>, Steffanie A. Strathdee<sup>6</sup>, Joel O. Wertheim<sup>6</sup>, Samuel R.  
7 Friedman<sup>7</sup>, Eric Bortz<sup>2</sup>, Ian Goodfellow<sup>1</sup>, Luke Meredith<sup>1</sup>, Tetyana I. Vasylyeva<sup>6,\*</sup>

8  
9  
10 1 – Division of Virology, Department of Pathology, University of Cambridge, Cambridge, UK

11 2 – Department of Biological Sciences, University of Alaska Anchorage, AK, USA

12 3 – Medical Sciences Division, University of Oxford, Oxford, UK

13 4 – Alliance for Public Health, Kyiv, Ukraine

14 5 – Odesa Regional Virology Laboratory, Odesa, Ukraine

15 6 – Division of Infectious Diseases and Global Public Health, University of California San  
16 Diego, CA, USA

17 7 – Department of Population Health, NYU Grossman School of Medicine, NY, USA

18  
19  
20 # - Authors contributed equally.

21 \* - To whom correspondence should be addressed, [tvasylyeva@health.ucsd.edu](mailto:tvasylyeva@health.ucsd.edu)

22  
23 Keywords: HIV, displacement, people who inject drugs, Ukraine, phylodynamics.  
24  
25  
26

27 **ABSTRACT**

28 Internally-displaced persons are often excluded from HIV molecular epidemiology surveillance  
29 due to structural, behavioral, and social barriers in access to treatment. We test a novel field-  
30 based molecular epidemiology framework to study HIV transmission dynamics in a hard-to-  
31 reach and highly-stigmatized group, internally-displaced people who inject drugs (IDPWID).  
32 We inform the framework by Nanopore generated HIV *pol* sequences and IDPWID migration  
33 history. In June-September 2020, we recruited 164 IDPWID in Odesa, Ukraine, and obtained  
34 34 HIV sequences from HIV-infected participants. We aligned them to publicly-available  
35 sequences (N=359) from Odesa and IDPWID regions of origin and identified 7 phylogenetic  
36 clusters with at least 1 IDPWID. Using times to the most recent common ancestors of the  
37 identified clusters and times of IDPWID relocation to Odesa, we infer potential post-  
38 displacement transmission window when infections likely to happen to be between 10 and 21  
39 months, not exceeding 4 years. Phylogeographic analysis of the sequence data show that  
40 local people in Odesa disproportionately transmit HIV to the IDPWID community. Rapid  
41 transmissions post-displacement in the IDPWID community might be associated with slow  
42 progression along the HIV continuum of care: only 63% of IDPWID were aware of their status,  
43 40% of those were in antiviral treatment, and 43% of those were virally suppressed. Such HIV  
44 molecular epidemiology investigations are feasible in transient and hard-to-reach communities  
45 and can help indicate best times for HIV preventive interventions. Our findings highlight the  
46 need to rapidly integrate Ukrainian IDPWID into prevention and treatment services following  
47 the dramatic escalation of the war in 2022.

48

49

50 **SIGNIFICANCE STATEMENT**

51 As human displacement is on the rise globally, it is crucial to develop ways in which infectious  
52 disease transmission can be monitored in displaced populations. We tested a new molecular  
53 epidemiology framework that relies on molecular epidemiology methods and portable HIV  
54 sequencing from samples collected from a hard-to-reach population of internally-displaced  
55 people who inject drugs (IDPWID). We show that by phylogenetically identifying potential HIV  
56 transmission clusters, estimating times of the clusters' origin, and referencing these times  
57 against the time of IDPWID's arrival to a new region, we can estimate an approximate window  
58 during an IDPWID's displacement journey when HIV transmissions are likely to happen.  
59 Further analysis indicated that HIV is primarily transmitted from local populations to IDPWID.

60

## 61 INTRODUCTION

62 An estimated 100 million people (over 1% of the global population) are currently forcibly  
63 displaced following economic, political, and climate instability (1). Internally displaced persons  
64 (IDPs, people who do not cross international borders) constitute the majority of forcibly  
65 displaced people. In 2021, 59.1 million IDPs were residing in low- and middle-income  
66 countries, 90% of whom have been displaced due to conflict and violence (2). In 2014, Ukraine,  
67 the country with the second-largest HIV epidemic in Europe (3), had between 1.4-2.1 million  
68 IDPs (Fig. 1A), the highest number in Europe, following the beginning of the war in eastern  
69 Ukraine (in Donetsk and Luhansk Oblasts) and the annexation of Crimea (Fig.1B) (4). Medical,  
70 economic, and social consequences of such large-scale displacement will have a long-lasting  
71 effect both on displaced and host populations.

72 Between 2014 and 2020, Odesa, a city on the Black Sea speculated to be the  
73 “birthplace” of Ukrainian HIV epidemic (5), has become home to nearly 40,000 Ukrainian IDPs  
74 (4). The prevalence of HIV and injection drug use (IDU) in IDPs resettled in Odesa remains  
75 unknown. Due to Russia’s stigmatizing approach to drug use (e.g., banning of medications for  
76 opioid use disorder), internally displaced people who inject drugs (IDPWID) disproportionately  
77 fled the occupied regions (6). Several successful HIV prevention interventions for PWID have  
78 been implemented in Odesa since 2013 (7, 8), but it is unknown whether IDPWID have had  
79 appropriate access to these preventive services upon relocation and whether HIV-infected  
80 IDPWID are enrolled in care. Generally, PWID in Ukraine progress less along the HIV care  
81 continuum compared to the general population: the latest available data for PWID in Ukraine  
82 showed that in 2017 58% of HIV-infected PWID were aware of their status, of whom 70% were  
83 on ART, and of whom 74% were virally suppressed (9), which was substantially lower than the  
84 same indicators for the general HIV-infected population in Ukraine in 2019 (68%-80%-94%,  
85 respectively) (10), though such comparisons are complicated by the absence of more recent  
86 data from PWID.

87 A number of factors mediate the relationship between displacement and HIV. For  
88 example, unstable housing post-displacement can be a barrier to accessing HIV care, and  
89 increasing the HIV vulnerability of displaced people (11). This might be exacerbated by  
90 behavioral risk factors such as IDU (12). IDPs’ social networks can play an important role:  
91 post-displacement social support networks can reduce HIV vulnerability in IDPs (13), but being  
92 in networks where IDU is prevalent puts displaced people at risk of injection initiation post-  
93 displacement (14).

94 Our previous phylogeographic analysis of HIV sequences available through routine  
95 drug-resistance testing illustrated that population displacement in Ukraine redistributed  
96 existing HIV infections and predisposed local outbreaks, particularly in PWID populations (15).  
97 While this analysis helped to reconstruct HIV transmission pathways and reveal key contextual  
98 insights, it likely undersampled IDPs, and particularly IDPWID, given that they are less likely  
99 to be in care and be selected for drug-resistance testing. This issue is not specific to Ukraine;  
100 global efforts to reinforce HIV molecular surveillance in the context of forced displacement are  
101 hindered by the scarcity of available sequencing data, primarily due to practical laboratory  
102 limitations concerning hard-to-reach mobile populations, such as IDPs. In the settings of large-  
103 scale forced displacement access to well-equipped laboratories is often limited. While field-  
104 based sequencing using lab-in-a-suitcase approach has been applied to other pathogens (16-  
105 18), it has not been utilized for HIV.

106 Here, we present results of the first study to combine rapid field-deployable Nanopore  
107 HIV sequencing conducted in a field-simulated environment and migration data collected from  
108 a hard-to-reach transient population (IDPWID). We integrate genetic and socio-behavioral

109 information in a socio-molecular framework to describe HIV transmission and care dynamics  
110 among IDPWID following displacement in Ukraine. We suggest that by combining  
111 phylodynamic analysis with data about displacement histories, we can identify times when HIV  
112 transmissions are likely to happen in IDPWID. We also use phylogeographic analysis to infer  
113 directionality of HIV transmission between displaced and local populations.

114

## 115 **RESULTS**

### 116 ***Study population***

117 A total of 164 IDPWID were recruited in a Spatial and Temporal Rapid Epidemiological  
118 Analysis in Migrants (STREAM) project in Odesa, Ukraine, in June-September 2020 using  
119 respondent-driven sampling (RDS) (19). We started recruitment with 8 seeds who were HIV-  
120 infected and not receiving ART IDPWID (details in Methods and Supplementary, Fig 1C). Most  
121 participants received 3 coupons to recruit peers; HIV-positive participants who were not  
122 receiving ART at the time of recruitment received up to 8 coupons. Most participants identified  
123 as male (81.1%) and arrived in Odesa between 2014-2015 (53.7%) (Table 1). The median  
124 participant age was 37 years old (range 20 – 63) at the time of enrolment. The median length  
125 of IDU experience was 10 years (range 2 – 40).

126

### 127 ***HIV prevalence, testing history, and cascade of care***

128 Previous HIV testing was reported by 91.5% (N = 150) of participants, of whom 24%  
129 (N=36) reported a previous positive test result. We removed the seeds (N=8) from further  
130 calculations because they were selected based on their HIV-status and engagement in care.  
131 Rapid testing as part of this study identified a total seroprevalence of HIV of 35.8% (N = 56 out  
132 of the 156 non-seed participants). Of those who tested positive for HIV by rapid test, 63% (N  
133 = 35) knew their HIV-infected status. Of those, 40.0% (N = 14) were on ART treatment at the  
134 time of the survey; 43% (N = 6) were virally suppressed (latest viral load measurement <50  
135 copies/ml and no HIV amplification in this study) (Figure 1D).

136

### 137 ***Migration journey, housing, and IDU***

138 Most IDPWID had resided in Donetsk Oblast before 2014 (51.2%) and left it within a  
139 year from the beginning of the war in April 2014 (69.5%) (Figure 1A and 1B, Table 1). The  
140 majority of them immediately settled in Odesa following displacement (68.3%); of the rest, the  
141 most common regions for intermediate settlement prior to arrival in Odesa included Kyiv city  
142 (28.8%) and Kharkiv (25%) amongst other locations across Ukraine, Russia, and Poland.  
143 Those who immediately settled in Odesa reported that transit time between leaving their region  
144 of origin and arriving to Odesa was  $\leq 2$  days, whilst those settled elsewhere prior to arrival in  
145 Odesa had a median transit phase of 294 days (range 20 days – 5.5 years). The majority of  
146 IDPWID in our sample settled with relatives, friends, or in rented accommodation, both  
147 immediately following displacement and at the time of the study in 2020 (50% and 60.4%,  
148 respectively). Of those who resided in an IDP shelter immediately following displacement  
149 (11.6%), the median length of stay was seven months (range one month - six years). Over  
150 three times more participants reported homelessness in Odesa at the time of the study  
151 compared to immediately following displacement (18.9% vs. 5.5% of the sample, respectively).  
152 In this study, 30.2% (N=49) of IDPWID did not report IDU prior to the conflict, of whom 48.9%  
153 (N=24) reported starting IDU after relocation to Odesa. PWID in unstable housing situation at  
154 the time of the survey were more likely to report IDU in the last 30 days ( $\chi^2 = 3.9, p = 0.048$ ).

155

### 156 ***HIV sequence data***

157 As a proof-of-principle, we conducted all wet laboratory work in a field-simulated  
158 environment at the Odesa Regional Virology Laboratory, utilizing a “lab-in-a-suitcase”  
159 approach (ARTIC Network) and using only portable and field-applicable equipment for Oxford  
160 Nanopore Technologies (ONT) sequencing as described elsewhere (16-18) (see  
161 Supplementary Text for more details). Of the 64 serum samples collected from participants  
162 who tested HIV-positive with a rapid HIV test, HIV was amplified in 47 samples which were  
163 further selected for library preparation and sequencing. No amplification in the other 17  
164 samples as visualized by agarose gel electrophoresis was likely due to the low initial amount  
165 of the viral template RNA; 9 of those samples were from participants who were on ART. Of the  
166 47 sequenced samples, 34 resulted in the assembly of partial *pol* gene sequences of protease  
167 (PR) and reverse transcriptase (RT) regions (1.1kb); the remaining 13 sequences had lower  
168 coverage depth (<20x threshold).

169 All 34 assembled sequences were assigned as HIV-1 subtype A1 (Supplementary  
170 Table 1). Only one major non-nucleoside reverse transcriptase inhibitor (NNRTI) DRM  
171 (K103N) was identified in 2 STREAM samples which constituted 6% of the total number of  
172 sequences (N = 34) and 7% of the treatment-naïve individuals for whom we obtained  
173 sequences (N = 28); 2 other NNRTIs (V179I and V179E) were identified in 12 other STREAM  
174 samples (35%) (see Supplementary Text for more details).

175 Additionally, we downloaded 359 reference sequences available through the Los  
176 Alamos National Laboratory (LANL) database sampled in Odesa, Donetsk, Luhansk, and  
177 Crimea (N = 252, 81, 16, and 10, respectively). Together with the 34 sequences generated in  
178 this study, the reference sequences formed a full dataset (N = 393) further used for  
179 phylogenetic analysis.

180

### 181 ***Description of HIV transmission clusters***

182 We inferred a Maximum Likelihood (ML) phylogenetic tree based on the sequences in  
183 the full dataset and identified 19 potential transmission clusters: 12 of them included reference  
184 sequences only and were described before (7), the other 7 included at least one IDPWID  
185 sequence from the STREAM project. The 7 STREAM clusters comprised 15 sequences (13  
186 STREAM and 2 reference sequences): 6 dyads and 1 triad (Table 2 and Figure 2). Of the 13  
187 STREAM participants whose sequences were in transmission clusters, 10 (77%) reported  
188 previous HIV testing post-displacement to Odesa, of those 9 (90%) knew about their HIV-  
189 positive status prior to participation in the STREAM study, and of those 6 had never taken ART  
190 (67%). Of the 3 participants who were on ART, two had their most recent viral load  
191 measurements at >200 copies/uL (49,300 and 14,500).

192 Clusters 3 and 5 likely originated post-conflict and after the time of the IDPWID arrival  
193 to Odesa. The time to the most recent common ancestor (TMRCA) for clusters 3 and 5 was  
194 inferred to be in July 2017 [95% Highest Posterior Density (HPD) February 2013 – February  
195 2020] and November 2017 [October 2014 – January 2020], respectively. For cluster 3, the  
196 likely transmission window was between November 2015 and July 2017 (no later than  
197 February 2020) based on the time of arrival to Odesa of the last participant in the cluster and  
198 the cluster TMRCA. Participants in cluster 3 both had the K103N mutation (mutation sites were  
199 masked in all phylogenetic analyses). For cluster 5, the transmission likely happened between  
200 January 2017 and November 2017, based on the same criteria. The other five clusters are  
201 unlikely to represent direct transmission based on the fact that some participants come from  
202 different regions and cluster TMRCA predate their arrival to Odesa; the TMRCA for clusters  
203 1, 2, 4, 6, and 7 were estimated to be in 2006 (2000–2011), 2009 (2001–2016), 2013 (2007–  
204 2018), 1997 (1987–2007) and 2003 (1992–2011), respectively.

205 ***Phylogeographic analysis***

206 We performed phylogeographic analysis to describe patterns of viral lineage  
207 movement between the IDPWID and local populations. The initial analysis included 252  
208 reference Odesa sequences (“Local-Odesa” group which included sequences sampled from  
209 the general population and various transmission risk groups; at least 20% of these sequences  
210 were from PWID (7)) and 34 STREAM sequences (“IDPWID” group). This analysis showed  
211 that the absolute majority (99.7%, 95% HPD: 91%-100%) of viral lineage migration events  
212 (instances when a viral lineage moved from one group to another) were from the “Local-  
213 Odesa” to the “IDPWID” group. Since the number of sequences was substantially greater in  
214 the “Local-Odesa” group, we ran multiple sensitivity analyses to balance the number of  
215 sequences in both groups and match the number of sequences in the “Local-Odesa” and  
216 “IDPWID” groups (N=34 each and N=68 total for each subsample). For this purpose, analyses  
217 were repeated with the following subsampling approaches for the “Local-Odesa” group: 1) ten  
218 analyses with 34 random sequences from Odesa; 2) ten analyses only with Odesa sequences  
219 from PWID; 3) one analysis with 34 of the most recent sequences from Odesa (the most recent  
220 sequences from the “Local-Odesa” group included sequences collected in 2017, 2018, and  
221 2019). In all these analyses, the “Local-Odesa” group remained the main viral lineage exporter  
222 – the average percent of viral lineage migration events across all 21 subsamples was 99%  
223 (95% BCI: 97-100%) (Supplementary Table 2).

224 In addition, to estimate the viral lineage movement pattern independently from the  
225 participants’ displacement status, we performed a permutation test. To that effect, in each of  
226 the ten subsamples from the first subsampling approach above we randomly rearranged  
227 (shuffled) displacement status assignments for the sequences. In this analysis, six out of the  
228 ten subsamples accounted on average for 99% (BCI: 95-100%) of viral lineage migration  
229 events from the “Local-Odesa” to the “IDPWID” group. Four out of 10 subsamples showed  
230 99% (BCI: 94-100%) average proportion of viral lineage movements from the “IDPWID” to the  
231 “Local-Odesa” group.

## 232 DISCUSSION

233 Here, we tested a framework for rapid epidemiological investigations in a hard-to-reach  
234 population often omitted from molecular epidemiological surveillance efforts and showed that  
235 a combination of phylodynamic analysis and information on migration history allows estimating  
236 the window when transmissions likely occurred post-displacement. IDPWID are particularly at  
237 risk for HIV soon after displacement and they are receiving HIV disproportionately from local  
238 communities.

239 Our phylogeographic analysis indicated consistent viral lineage movement from local  
240 populations to IDPWID consistent with the pattern observed in other migrants (20). In our  
241 analysis very few of the identified clusters included both sequences from IDPWID and local  
242 populations; either attributable to the low IDPWID sample size in our analysis or to limited  
243 mixing between the local population and IDPWID (21). IDPs often rely on support networks  
244 from their home towns for socialization and to address daily needs such as finding housing,  
245 creating tight networks post-displacement (22). Limited adaptation, recently reported for IDPs  
246 in Ukraine (23), could have created pockets of IDPWID within the Odesa PWID community  
247 that were not linked to HIV prevention. Such pockets would be susceptible to infections  
248 transmitted from the local population, which IDPWID need to rely on to procure drugs or  
249 injection equipment. Importantly, the directionality of HIV transmission from local to displaced  
250 population inferred through our phylogeographic analyses can contribute to dismantling the  
251 “anti-migration” narratives that picture migrants as a burden and a public health threat.

252 Our framework based on combining TMRCA estimates of phylogenetic clusters and  
253 migration histories of people in the clusters allowed us to estimate the window period during  
254 which HIV transmission occurred post-displacement to be between 10 and 21 months, not  
255 exceeding 4 years. This method complements other phylogenetically-based methods to  
256 estimate post-displacement HIV acquisition (24) by specifying the possible window for  
257 effective interventions. Using larger datasets or full-length genomes for analysis might allow  
258 further narrowing down of this window, which can inform the timeliness of prevention  
259 measures.

260 To enable rapid applications of this approach in environments without access to well-  
261 equipped laboratories, we performed all laboratory work in a field-simulated environment using  
262 only field-applicable equipment (a “lab-in-a-suitcase” approach) and ONT sequencing  
263 protocols. The equipment and workflow of a “lab-in-a-suitcase” have already proved to be  
264 robust and portable even with minimal power requirements, enabling effective implementation  
265 of viral genomic sequencing in resource limited settings (16-18). In war-affected settings and  
266 other settings with large-scale forced displacement, local laboratories might not be equipped  
267 for sequencing and molecular epidemiology research; in such settings “lab-in-a-suitcase” is  
268 feasible, reliable, and affordable approach. Even in situations when no laboratory facilities are  
269 available, the 'lab-in-a-suitcase' approach allows utilising other infrastructure or rely on mobile  
270 laboratory units. Moreover, as security conditions in such locations can deteriorate rapidly,  
271 also affecting further population migration, a "lab-in-a-suitcase" can be transported, assembled  
272 and disassembled easily and quickly, allowing the lab to be relocated immediately.

273 Although ONT sequencing initially reported high single-base error rate (1-4%) making  
274 this technology inapplicable in clinical HIV settings, improvements in the sequencing  
275 biochemistry and computational approaches for read accuracy, now render Nanopore  
276 protocols comparable to those of Sanger sequencing (25-28). While investigations in the use  
277 of MinION technology for identification of point-mutations and potential clinical applications are  
278 on-going, the current technology is likely sufficient for phylogenetic reconstruction, particularly

279 that based on short sequences such as HIV PR-RT. Importantly, using ONT to produce HIV  
280 sequences in the field can help significantly reduce the previous lag between obtaining  
281 samples, genetic sequencing, and analysis of sequence data (16), and can provide near real-  
282 time evidence to inform HIV prevention services in rapidly developing situations, like the on-  
283 going war in Ukraine. Furthermore, it can make HIV sequencing more available and easier  
284 scalable in resource-limited environments.

285 Progression along the continuum of care, which affects post-displacement HIV  
286 transmission, was substantially lower in IDPWID (63% aware of their status/ 40% in treatment/  
287 43% virally suppressed) compared to that previously reported for non-displaced PWID in  
288 Ukraine (58%/70%/74%, respectively) (9) who were already behind the general population in  
289 Ukraine (68%/80%/94%, respectively) (10) (Figure 1D). Less than half of IDPWID were linked  
290 to care, indicating a huge gap in care engagement for Ukrainian IDPs, as we previously  
291 suggested [17]. Though normal RDS is recognized as an effective sampling approach for HIV  
292 studies in displaced populations (33), we recognize that ART uptake in our sample might be  
293 under-estimated given enhanced coupon distribution for HIV-positive participants who were  
294 not in treatment. However, the lower level of viral suppression in this cohort (less than half of  
295 those in treatment were virally suppressed) is an unbiased indicator of lower levels of HIV  
296 treatment engagement amongst IDPWID. The observed increase in homelessness, an  
297 independent risk factor for HIV acquisition for PWID [8], at the time of the study (18.9%),  
298 compared to the period immediately following displacement (5.5%), could also affect  
299 progression along the HIV care continuum. IDPs are likely to reside in high-risk environments  
300 with limited prevention and treatment resources, thus long-term housing solutions for IDPs  
301 could help minimize infection risks [6].

302 Many IDPWID in our sample initiated IDU after the beginning of the conflict (30.2%),  
303 half of those (48%) started injecting after they reached Odesa. Substance use amongst forcibly  
304 displaced people as a coping mechanism following conflict, violence, and migration stress is  
305 well documented in current literature [30] and will require a special focus in Ukraine,  
306 particularly in regions that are currently occupied by Russia where drug use is criminalized  
307 (34). While these data are subject to reporting biases, we expect these to be low in our sample,  
308 as is often the case for those for whom the recall events were more emotional or marked a  
309 transition point in their life, like war or forced displacement events for IDPWID [32].

310 As the war in Ukraine escalated to a full-scale invasion in February 2022 when Russia  
311 invaded multiple regions of Ukraine, resulting in the largest refugee crisis in Europe since  
312 World War II (Fig. 1A) (35), challenges in curbing the HIV epidemic in the country have reached  
313 unprecedented levels. ART drug supply disruptions, struggles in delivering prevention  
314 services, and huge reduction in HIV testing will have detrimental effect on the Ukrainian HIV  
315 epidemic (36, 37). For IDPWID, criminalization of drug use on the occupied territories and the  
316 customary exclusion of people who use drugs from HIV treatment services will create  
317 additional challenges (34). We show that integration of detailed sociodemographic and  
318 migration data alongside phylodynamic inference can help resolve transmission dynamics in  
319 this hard-to-reach populations and identify gaps in treatment and prevention efforts.  
320 Specifically, deciphering the infection timing in this study provides evidence for the necessity  
321 to scale up HIV prevention interventions within the timeframe of risk - the first 2 years following  
322 migration. Increased monitoring and understanding of the dynamics of infectious disease  
323 transmission networks, timing of transmission events, and risk factors unique to the  
324 experiences faced by IDPs is a crucial step in the development of effective health  
325 interventions.



326 **Funding**

327 This work was supported by the Global Challenges Research Fund and the Wellcome  
328 Institutional Strategic Support Fund of the University of Oxford (PI Vasyllyeva). TIV is supported  
329 by the Branco Weiss Fellowship. JOW is supported by an NIH-NIAID R01 (AI135992). SRF is  
330 supported by the US National Institute on Drug Abuse under Grant P30DA011041. AY  
331 acknowledges support from Somerville College MTST Development Award and Catherine  
332 Hughes Fund. IG is a Wellcome Senior Fellow. GK, LM, and IG are supported by grants from  
333 the Wellcome Trust (Refs: 207498/Z/17/Z and 206298/B/17/Z). BS is supported by an NIH-  
334 NIDA K01 (DA049665). LRS is supported by a NIH-Fogarty/NIDA R21 (TW011785).  
335 Bioinformatics analyses reported herein were in part supported by an NIH NIGMS Institutional  
336 Development Award (IDeA), grant no. P20GM103395 (Alaska INBRE: Pathogenomics server  
337 – to E.B.).

338

339 **Acknowledgements**

340 We acknowledge the assistance of public health workers from the non-governmental  
341 organisations “Alliance for Public Health” and “Way Home” in collection of epidemiological and  
342 behavioural data and biological samples, and their ongoing efforts of providing preventative  
343 measures and infection management to at risk populations in Ukraine. We also express our  
344 sincere gratitude towards study participants.

345

346 **Declaration of interest**

347 We declare no competing interests.

348

349 **Data availability**

350 Nucleotide sequence data generated in this study are available in the GenBank  
351 database under the accession numbers: OP899410– OP899443.

352

353

## 354 **METHODS**

### 355 ***Study design and participants***

356 This study was approved by the University of Oxford Tropical Research Ethical  
357 Committee (Reference: 530-20). Written informed consent was obtained from all participants.  
358 We used modified RDS technique (19) to recruit IDPWID starting with eight index cases, who  
359 were defined as people who 1) reported IDU in the last 30 days, 2) were internally displaced  
360 from Donetsk, Luhansk, or Crimea because of the war irrespective of their nationality, 3) were  
361 living with HIV, but were not receiving ART treatment at the time of study enrolment, and 4)  
362 were at least 18 years old. The number of distributed coupons differed depending on the HIV  
363 status of a participant (Figure 1C): the index cases and HIV-positive network members who  
364 were not in treatment at the time of the interview were given eight coupons to recruit other  
365 IDPs with history of IDU; HIV-positive IDPWID receiving ART and HIV-negative network  
366 members were offered three coupons to recruit other IDPWID. Recruitment was terminated  
367 after the field study period of three months was completed.

368

### 369 ***Data Collection***

370 Participants were interviewed by social workers from the non-governmental  
371 organization “Way Home” about their migration history, their sociodemographic and housing  
372 information, and screened for HIV using Wondfo® One Step HIV1/2 Whole  
373 Blood/Serum/Plasma. All participants who tested positive for HIV during the study were  
374 counselled by trained healthcare workers and linked to care. Whole blood samples (6 ml) were  
375 collected from all participants, and serum was isolated at the Odesa Regional Virology  
376 Laboratory and stored at  $-80^{\circ}\text{C}$ .

377

### 378 ***Statistical analysis***

379 We defined current IDU status as IDU in the last 30 days (yes/no). We dichotomized  
380 the housing status into stable (living in one's own house or flat, living with relatives or friends,  
381 and living in rented accommodation) and unstable (living in IDPs shelters, frequently changing  
382 accommodation, being homelessness and other housing types for example hostels and  
383 rehabilitation centers). We used a chi-square test to investigate whether there was a significant  
384 difference in recent IDU status by housing status post-displacement.

385

### 386 ***Sequencing and bioinformatics***

387 For library preparation viral RNA was extracted from 140  $\mu\text{L}$  serum using QIAamp Viral  
388 RNA Minikit (Qiagen), following the manufacturer's instructions. Extracted RNA was aliquoted  
389 and stored until use at  $-80^{\circ}\text{C}$ . We adapted the primer set and a One-Step RT-PCR assay for  
390 genotyping all HIV-1 group M subtypes and circulating recombinant forms (CRF) developed  
391 by the Centers for Disease Control and Prevention (38, 39). The assay amplifies a fragment  
392 of 1,084 base pairs of the HIV-1 partial *gag-pol* polyprotein with protease and reverse  
393 transcriptase encoding regions (see Supplementary Text for details). The amplicons were  
394 purified with SPRI beads (x1 ratio), barcoded with native barcodes (EXP-NBD104 (1-12) and  
395 EXP-NBD114 (13-24)) and prepared with a ligation-based sequencing kit (SQK-LSK109)  
396 (ONT) according to the ARTIC Network nCoV-2019 Sequencing Protocol V3 LoCost (40). Final  
397 libraries were loaded onto new R9.4.1 flow cells (FLO-MIN106) and sequenced with a MinION  
398 Mk1B device. The field environment was simulated in the laboratory using a “lab-in-a-suitcase”  
399 approach developed by the ARTIC Network (18) where hydroponic grow tents were  
400 implemented to physically separate pre-PCR, post-PCR, and master mix work to prevent

401 contamination of stock reagents or samples. Specifically, to simulate the “lab-in-a-suitcase”  
402 approach, only 12V batteries-powered library preparation equipment, such as vortexes,  
403 centrifuges, and miniPCR machines, was used. The MinION devices were powered from a  
404 USB3 port of a laptop. A curated equipment list is available on the ARTIC Network website  
405 (<https://artic.network/ebov/ebov-seq-kit.html>).

406 Reads were basecalled and demultiplexed with Guppy version 4.3.4. The reads were  
407 mapped to nucleotide positions 2100-3200 of HXB2 reference genome with minimap2. The  
408 reference was passed to Racon as a draft assembly and polished with the mapped reads. The  
409 resulting consensus was polished with Medaka. HIV subtype assignment was performed using  
410 REGA HIV-1 Subtyping Tool V3 (41).

411

### 412 ***Phylogenetic analysis***

413 We downloaded all publicly available through LANL sequences from Odesa and  
414 regions of IDPWID origin (Donetsk, Luhansk, and Crimea) with available sampling date  
415 information (Supplementary Text). 150 of the Odesa sequences on LANL came from the  
416 Transmission Reduction Intervention Study (TRIP) (7, 8, 42) and had associated information  
417 on IDU. We aligned all STREAM sequences to the reference data using Muscle algorithm (43)  
418 in Aliview (44), masked positions associated with drug-resistance (45), and used RAXML (46)  
419 to reconstruct Maximum Likelihood (ML) phylogenetic tree. Potential transmission clusters  
420 relevant to displacement were identified using ClusterPicker (47) and defined as clades with  
421 two or more sequences, at least one of which must be from IDPWID, that had within-cluster  
422 genetic distance <2.0%, which is within commonly-used thresholds for HIV clusters definition  
423 (48).

424

425 We inferred molecular clock phylogenetic trees from the full dataset and estimated the  
426 TMRCA of all identified transmission clusters using BEASTv1.10.8 (49) (BEAST analyses  
427 parameters are specified in the Supplementary Text). To quantify viral exchange between local  
428 Odesa population and IDPWID, we performed a discrete trait phylogeographic analysis using  
429 the tree distribution containing 2,000 trees previously estimated in BEAST. Sequences from  
430 Donetsk, Luhansk, and Crimea were pruned off the trees using PAUP as we were only  
431 interested in the dynamics between local and IDPWID populations in Odesa. We assigned  
432 STREAM sequences to the “IDPWID” group and all other sequences from Odesa were  
433 assigned to “Local-Odesa” group. To count the expected number of viral lineage migration  
434 events among transmission groups, we used a robust counting (Markov jumps) approach (15,  
435 50). To control for the fact that we had a significantly higher number of sequences from Odesa,  
436 we ran three separate sensitivity analyses where we reduced the number of “Odesa”  
437 sequences to match the number of “IDPWID” sequences (details in the Supplementary Text).

438

439

440

441

442 **Figures**

443  
444

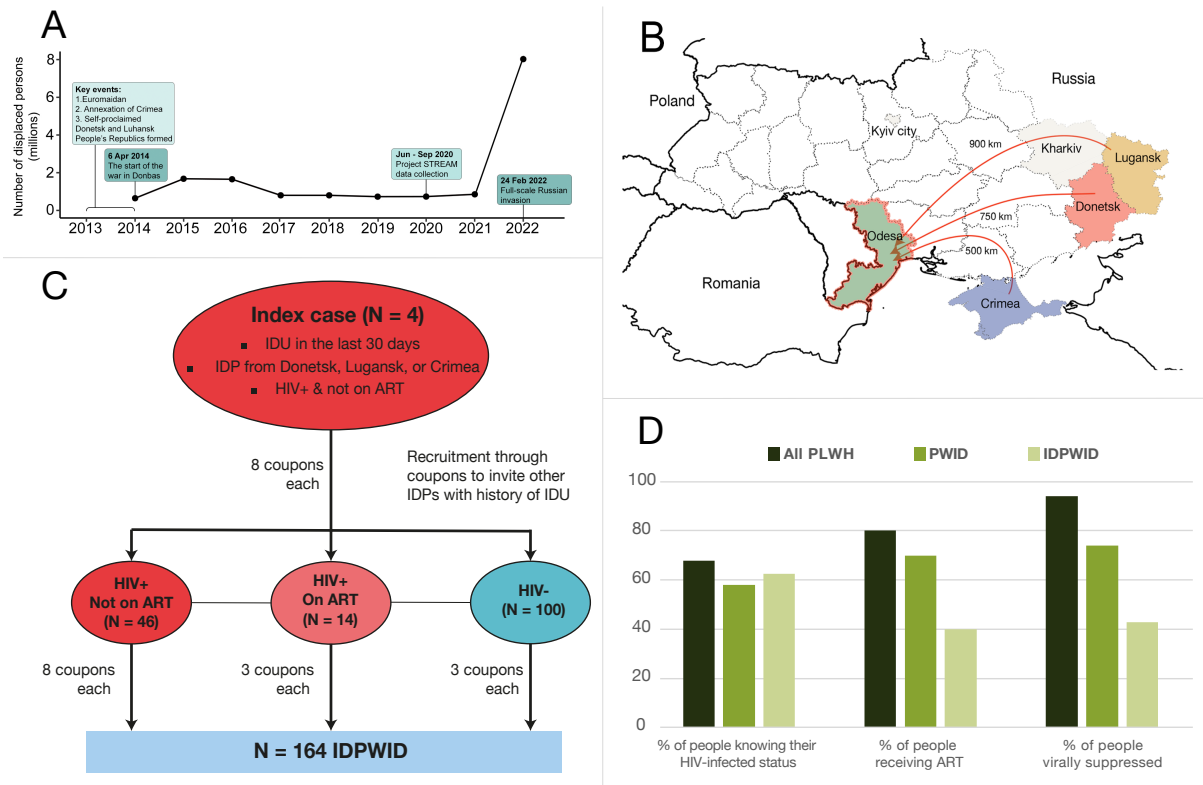

445  
446

447 **Figure 1.**

448 **A** – Timeline chart of key events of the Russia war on Ukraine and the number of internally  
 449 displaced people in Ukraine over time;  
 450 **B** – Map of Ukraine illustrating migration journeys. Beige color indicates regions that were  
 451 often a place of settlement prior to arrival to Odesa;  
 452 **C** - Recruitment flow diagram. IDU – injection drug use, ART – anti-retroviral treatment, IDPs  
 453 – internally displaced persons, IDPWID – internally displaced people who inject drugs.  
 454 **D** - Graphics of proportion of people engaged in each of the main stages of HIV continuum of  
 455 care among key populations in Ukraine. PLWH – people living with HIV. Estimates for PLWH  
 456 and PWID were obtained from (10) and (9).

457  
458

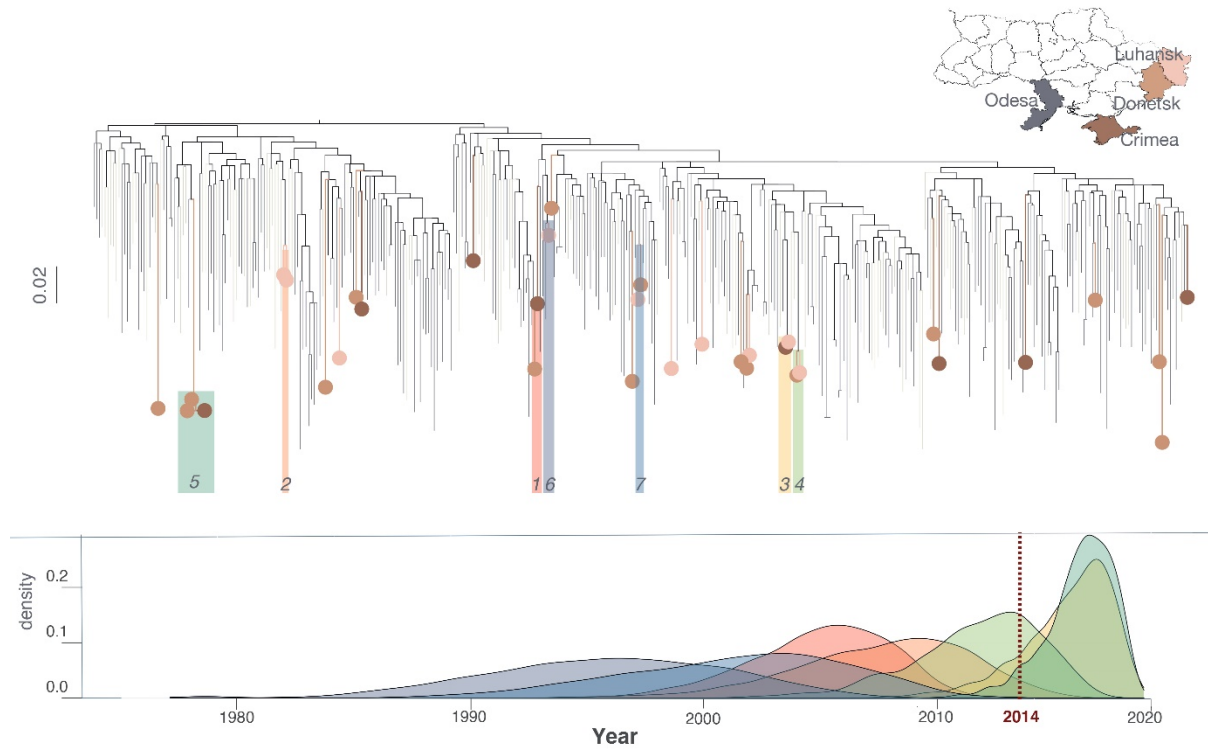

459  
460  
461  
462  
463  
464  
465  
466

**Figure 2.** Maximum Likelihood phylogenetic tree based on the sequences in the full dataset. The colored circles on the tips correspond to the home regions of IDPWID sequenced in this study. Phylogenetic clusters are numbered and highlighted on the tree and TMRCA estimates for each cluster are presented on the plot below with corresponded colors (each color corresponds to a cluster as marked on the phylogenetic tree above). Scale bars indicate substitutions/site/year.

467 **Tables**

**Table 1.** Characteristics of IDPWID recruited in Odesa in 2020

| <b>Part 1. Sociodemographic characteristics</b>         |                                  |          |          |
|---------------------------------------------------------|----------------------------------|----------|----------|
|                                                         |                                  | <b>N</b> | <b>%</b> |
| <b>Sex</b>                                              | Male                             | 133      | 81.1     |
|                                                         | Female                           | 31       | 18.9     |
| <b>Age (years), median (range)</b>                      | 37 (20-63)                       |          |          |
| <b>Age (years)</b>                                      | 20-29                            | 20       | 12.2     |
|                                                         | 30-39                            | 78       | 47.6     |
|                                                         | 40-49                            | 51       | 31.1     |
|                                                         | 50-63                            | 15       | 9.1      |
| <b>Other risk behaviours</b>                            | Sex work                         | 6        | 3.7      |
|                                                         | MSM contacts                     | 2        | 1.2      |
| <b>Duration of IDU (years)</b>                          | 2 to 10                          | 86       | 53.1     |
|                                                         | 11 to 20                         | 54       | 33.3     |
|                                                         | 21 to 30                         | 19       | 11.7     |
|                                                         | 31 to 40                         | 3        | 1.9      |
| <b>IDU in the past 30 days</b>                          | Yes                              | 152      | 93.8     |
|                                                         | No                               | 10       | 6.2      |
| <b>Education</b>                                        | Nine or less school years        | 44       | 26.8     |
|                                                         | High School                      | 54       | 32.9     |
|                                                         | Technical School                 | 52       | 31.7     |
|                                                         | University Degree                | 13       | 7.9      |
|                                                         | Other                            | 1        | 0.6      |
| <b>Marital Status</b>                                   | Married                          | 23       | 14       |
|                                                         | Living with sexual partner       | 40       | 24.4     |
|                                                         | Single                           | 77       | 47       |
|                                                         | Divorced or widowed              | 23       | 14       |
|                                                         | Other                            | 1        | 0.6      |
| <b>Part 2. Migration information</b>                    |                                  |          |          |
| <b>Home region</b>                                      | Crimea                           | 35       | 21.3     |
|                                                         | Donetsk                          | 84       | 51.2     |
|                                                         | Lugansk                          | 45       | 27.4     |
| <b>Alternative settlement prior to arrival in Odesa</b> | Yes, resided in another region   | 52       | 31.7     |
|                                                         | No, settled in Odesa immediately | 112      | 68.3     |
| <b>Settlement prior to arrival to Odesa</b>             | Kyiv                             | 15       | 28.8     |
|                                                         | Kharkiv                          | 13       | 25       |
|                                                         | Other (Ukraine, Russia, Poland)  | 24       | 46.2     |
| <b>Duration of transit phase (days), median (range)</b> | 294 (20 - 2005)                  |          |          |
| <b>Arrival to Odesa</b>                                 | 2014-2015                        | 88       | 53.7     |

|                                                                    |                                                                            |     |      |
|--------------------------------------------------------------------|----------------------------------------------------------------------------|-----|------|
|                                                                    | 2016-2020                                                                  | 76  | 46.3 |
| <b>IDU initiation</b>                                              | Prior to conflict                                                          | 113 | 69.8 |
|                                                                    | After conflict                                                             | 49  | 30.2 |
| <b>IDU initiation</b>                                              | Prior to migration                                                         | 138 | 85.2 |
|                                                                    | After migration                                                            | 24  | 14.8 |
| <b>Housing (immediately following migration)</b>                   | Own house or flat                                                          | 13  | 7.9  |
|                                                                    | With relatives/friends/rented                                              | 99  | 60.4 |
|                                                                    | Shelter for IDPs                                                           | 19  | 11.6 |
|                                                                    | Frequently changed                                                         | 20  | 12.2 |
|                                                                    | Homeless                                                                   | 9   | 5.5  |
|                                                                    | Other (incl. hostel, rehabilitation centre)                                | 4   | 2.4  |
| <b>Length of stay in IDP shelter (months), median (range)</b>      | 7.1 (1-72)                                                                 |     |      |
| <b>Housing (now)</b>                                               | Own house or flat                                                          | 18  | 11   |
|                                                                    | With relatives/friends/rented                                              | 82  | 50   |
|                                                                    | Shelter for IDPs                                                           | 12  | 7.3  |
|                                                                    | Frequently changed                                                         | 19  | 11.6 |
|                                                                    | Homeless (living on the street, in abandoned buildings, or train stations) | 31  | 18.9 |
|                                                                    | Other                                                                      | 2   | 1.2  |
| <b>Part 3. Medical information</b>                                 |                                                                            |     |      |
|                                                                    |                                                                            |     |      |
| <b>Previous HIV test</b>                                           | Yes (excluding seeds)                                                      | 144 | 92.3 |
|                                                                    | No (excluding seeds)                                                       | 12  | 7.6  |
| <b>Previous HIV test result</b>                                    | Positive (excluding seeds)                                                 | 30  | 20.8 |
|                                                                    | Negative                                                                   | 114 | 79.1 |
| <b>ART (of those with previous positive test result)</b>           | Currently taking ART                                                       | 14  | 46.6 |
|                                                                    | Never took ART (excluding seeds)                                           | 14  | 46.6 |
|                                                                    | Previously took ART, but currently not in treatment (excluding seeds)      | 1   | 3.3  |
|                                                                    | Unknown                                                                    | 1   | 3.3  |
| <b>Virally suppressed (VL &lt; 200 copies) of those taking ART</b> |                                                                            | 10  | 71.4 |

468

469

**Table 2.** Cluster composition and time to the most recent common ancestor (TMRCA) for HIV phylogenetic clusters

| Seq GenBank ID                    | Cluster | N of sequences | TMRCA    | TMRCA 95% HPD         | Time of IDPWID arrival to Odesa    | Home region                     |
|-----------------------------------|---------|----------------|----------|-----------------------|------------------------------------|---------------------------------|
| [OP899421, MT348863]              | 1       | 2              | 2006     | 2000-2011             | May 2018                           | Crimea                          |
| [OP899419, OP899437]              | 2       | 2              | 2009     | Nov 2001-<br>Jan 2016 | Aug 2014,<br>Jun 2015              | Donetsk,<br>Crimea              |
| [OP899435, OP899443]              | 3       | 2              | Jul 2017 | Feb 2013-<br>Feb 2020 | Nov 2015,<br>May 2015              | Donetsk,<br>Lugansk             |
| [OP899440, OP899441]              | 4       | 2              | Sep 2013 | Nov 2007-<br>Jan 2018 | Dec 2015,<br>Sep 2017              | Crimea,<br>Crimea               |
| [OP899424, OP899410,<br>OP899423] | 5       | 3              | Nov 2017 | Oct 2014-<br>Jan 2020 | Jan 2017,<br>Mar 2016,<br>Jan 2017 | Donetsk,<br>Donetsk,<br>Donetsk |
| [OP899431, MT348826]              | 6       | 2              | 1997     | 1987-2007             | Mar 2020                           | Donetsk                         |
| [OP899432, OP899434]              | 7       | 2              | 2003     | 1992-2011             | Jul 2016,<br>Jul 2015              | Crimea,<br>Crimea               |

470

471



## 472 References

- 473
- 474 1. United Nations Higher Commissioner for Refugees: Ukraine, other conflicts push  
475 forcibly displaced total over 100 million for first time. 2022.
  - 476 2. Internal Displacement Monitoring Centre, Global Report on Internal Displacement  
477 2022. 2022.
  - 478 3. European Centre for Disease Prevention and Control/WHO Regional Office for Europe,  
479 HIV/AIDS surveillance in Europe 2015. 2016, European Centre for Disease Prevention and  
480 Control: Stockholm.
  - 481 4. United Nations Higher Commissioner for Refugees, Registration of Internal  
482 Displacement in Ukraine. 2021.
  - 483 5. Saad MD, Shcherbinskaya AM, Nadai Y, Kruglov YV, Antonenko SV, Lyulchuk MG, et  
484 al. Molecular epidemiology of HIV Type 1 in Ukraine: birthplace of an epidemic. *AIDS Res*  
485 *Hum Retroviruses*. 2006;22(8):709-14.
  - 486 6. Holt E. Conflict in Ukraine and a ticking bomb of HIV. *Lancet HIV*. 2018;5(6):e273-e4.
  - 487 7. Vasylyeva TI, Zarebski A, Smyrnov P, Williams LD, Korobchuk A, Liulchuk M, et al.  
488 Phylodynamics Helps to Evaluate the Impact of an HIV Prevention Intervention. *Viruses*.  
489 2020;12(4).
  - 490 8. Smyrnov P, Williams LD, Korobchuk A, Sazonova Y, Nikolopoulos GK, Skaathun B, et  
491 al. Risk network approaches to locating undiagnosed HIV cases in Odessa, Ukraine. *J Int*  
492 *AIDS Soc*. 2018;21(1).
  - 493 9. Sazonova Y, Kulchynska R, Sereda Y, Azarskova M, Novak Y, Saliuk T, et al. HIV  
494 treatment cascade among people who inject drugs in Ukraine. *PLoS One*.  
495 2020;15(12):e0244572.
  - 496 10. UNAIDS. Global AIDS Monitoring 2019: Ukraine 2019.
  - 497 11. Stone J, Artenie A, Hickman M, Martin NK, Degenhardt L, Fraser H, et al. The  
498 contribution of unstable housing to HIV and hepatitis C virus transmission among people who  
499 inject drugs globally, regionally, and at country level: a modelling study. *Lancet Public Health*.  
500 2022;7(2):e136-e45.
  - 501 12. Arum C, Fraser H, Artenie AA, Bivegete S, Trickey A, Alary M, et al. Homelessness,  
502 unstable housing, and risk of HIV and hepatitis C virus acquisition among people who inject  
503 drugs: a systematic review and meta-analysis. *Lancet Public Health*. 2021;6(5):e309-e23.
  - 504 13. Siriwardhana C, Ali SS, Roberts B, Stewart R. A systematic review of resilience and  
505 mental health outcomes of conflict-driven adult forced migrants. *Confl Health*. 2014;8:13.
  - 506 14. Melo JS, Mittal ML, Horyniak D, Strathdee SA, Werb D. Injection Drug Use Trajectories  
507 among Migrant Populations: A Narrative Review. *Subst Use Misuse*. 2018;53(9):1558-70.
  - 508 15. Vasylyeva TI, Liulchuk M, Friedman SR, Sazonova I, Faria NR, Katzourakis A, et al.  
509 Molecular epidemiology reveals the role of war in the spread of HIV in Ukraine. *Proc Natl Acad*  
510 *Sci U S A*. 2018;115(5):1051-6.
  - 511 16. Faria NR, Quick J, Claro IM, Thézé J, de Jesus JG, Giovanetti M, et al. Establishment  
512 and cryptic transmission of Zika virus in Brazil and the Americas. *Nature*. 2017;546(7658):406-  
513 10.
  - 514 17. Quick J, Loman NJ, Duraffour S, Simpson JT, Severi E, Cowley L, et al. Real-time,  
515 portable genome sequencing for Ebola surveillance. *Nature*. 2016;530(7589):228-32.
  - 516 18. Bruncker K, Jaswant G, Thumbi S, Lushasi K, Lugelo A, Czupryna A, et al. Rapid in-  
517 country sequencing of whole virus genomes to inform rabies elimination programmes [version  
518 2; peer review: 3 approved]. *Wellcome Open Research*. 2020;5(3).
  - 519 19. Heckathorn DD. Respondent-Driven Sampling: A New Approach to the Study of  
520 Hidden Populations. *Social Problems*. 1997;44(2):174-99.
  - 521 20. Pimentel VF, Pingarilho M, Sole G, Alves D, Miranda M, Diogo I, et al. Differential  
522 patterns of postmigration HIV-1 infection acquisition among Portuguese immigrants of different  
523 geographical origins. *AIDS*. 2022;36(7).
  - 524 21. Paraskevis D, Kostaki E, Nikolopoulos GK, Sypsa V, Psychogiou M, Del Amo J, et al.  
525 Molecular Tracing of the Geographical Origin of Human Immunodeficiency Virus Type 1

- 526 Infection and Patterns of Epidemic Spread Among Migrants Who Inject Drugs in Athens. *Clin*  
527 *Infect Dis.* 2017;65(12):2078-84.
- 528 22. Cantor D, Apollo, JO. Internal Displacement, Internal Migration and Refugee Flows:  
529 Connecting the Dots. London, UK: GCRF; 2020.
- 530 23. Singh NS, Bogdanov S, Doty B, Haroz E, Girnyk A, Chernobrovkina V, et al.  
531 Experiences of mental health and functioning among conflict-affected populations: A  
532 qualitative study with military veterans and displaced persons in Ukraine. *Am J*  
533 *Orthopsychiatry.* 2021;91(4):499-513.
- 534 24. Alvarez-Del Arco D, Fakoya I, Thomadakis C, Pantazis N, Touloumi G, Gennotte AF,  
535 et al. High levels of postmigration HIV acquisition within nine European countries. *AIDS.*  
536 2017;31(14):1979-88.
- 537 25. Rang FJ, Kloosterman WP, de Ridder J. From squiggle to basepair: computational  
538 approaches for improving nanopore sequencing read accuracy. *Genome Biol.* 2018;19(1):90.
- 539 26. Zhang Y, Ma L. Application of high-throughput sequencing technology in HIV drug  
540 resistance detection. *Biosafety and Health.* 2021.
- 541 27. Gonzalez C, Gondola, J., Ortiz, AY, Castillo, J.M., Pascale, J.M., Martinez, A.A.  
542 Barcoding analysis of HIV drug resistance mutations using Oxford Nanopore MinION (ONT)  
543 sequencing. *BioRxiv.* 2018.
- 544 28. Sarkhouh H, Chehadeh W. CODEHOP-Mediated PCR Improves HIV-1 Genotyping  
545 and Detection of Variants by MinION Sequencing. *Microbiol Spectr.* 2021;9(2):e0143221.
- 546 29. Akinsete O, Hirigoyen D, Cartwright C, Schut R, Kantor R, Henry K. K103N mutation  
547 in antiretroviral therapy-naïve African patients infected with HIV type 1. *Clin Infect Dis.*  
548 2004;39(4):575-8.
- 549 30. Kirichenko A, Kireev D, Lopatukhin A, Murzakova A, Lapovok I, Saleeva D, et al.  
550 Prevalence of HIV-1 drug resistance in Eastern European and Central Asian countries. *PLoS*  
551 *One.* 2022;17(1):e0257731.
- 552 31. Palumbo PJ, Zhang Y, Fogel JM, Guo X, Clarke W, Breaud A, et al. HIV drug resistance  
553 in persons who inject drugs enrolled in an HIV prevention trial in Indonesia, Ukraine, and  
554 Vietnam: HPTN 074. *PLoS One.* 2019;14(10):e0223829.
- 555 32. Alliance for Public Health. Annual Report. Kyiv, Ukraine: ICF "Alliance for Public  
556 Health"; 2015.
- 557 33. Wirtz AL, Page KR, Stevenson M, Guillén JR, Ortíz J, López JJ, et al. HIV Surveillance  
558 and Research for Migrant Populations: Protocol Integrating Respondent-Driven Sampling,  
559 Case Finding, and Medicolegal Services for Venezuelans Living in Colombia. *JMIR Res*  
560 *Protoc.* 2022;11(3):e36026.
- 561 34. Roberts L. Surge of HIV, tuberculosis and COVID feared amid war in Ukraine. *Nature.*  
562 2022;603(7902):557-8.
- 563 35. United Nations Higher Commissioner for Refugees. Refugees fleeing Ukraine (since  
564 24 February 2022)\*. 2022.
- 565 36. Holt E. Russia's invasion of Ukraine threatens HIV response. *Lancet HIV.*  
566 2022;9(4):e230.
- 567 37. Vasylyev M, Skrzat-Klapaczynska A, Bernardino JI, Sandulescu O, Gilles C, Libois A,  
568 et al. Unified European support framework to sustain the HIV cascade of care for people living  
569 with HIV including in displaced populations of war-struck Ukraine. *Lancet HIV.* 2022.
- 570 38. Inzaule S, Yang C, Kasembeli A, Nafisa L, Okonji J, Oyaro B, et al. Field evaluation of  
571 a broadly sensitive HIV-1 in-house genotyping assay for use with both plasma and dried blood  
572 spot specimens in a resource-limited country. *J Clin Microbiol.* 2013;51(2):529-39.
- 573 39. Zhou Z, Wagar N, DeVos JR, Rottinghaus E, Diallo K, Nguyen DB, et al. Optimization  
574 of a low cost and broadly sensitive genotyping assay for HIV-1 drug resistance surveillance  
575 and monitoring in resource-limited settings. *PLoS One.* 2011;6(11):e28184.
- 576 40. Quick J. nCoV-2019 sequencing protocol v3 (LoCost) V.3 Birmingham, UK2020  
577 [Available from: <https://www.protocols.io/view/ncov-2019-sequencing-protocol-v3-locost-bp2l6n26rgqe/v3>.  
578
- 579 41. Pineda-Pena AC, Faria NR, Imbrechts S, Libin P, Abecasis AB, Deforche K, et al.  
580 Automated subtyping of HIV-1 genetic sequences for clinical and surveillance purposes:

- 581 performance evaluation of the new REGA version 3 and seven other tools. *Infect Genet Evol.*  
582 2013;19:337-48.
- 583 42. Nikolopoulos GK, Pavlitina E, Muth SQ, Schneider J, Psychogiou M, Williams LD, et al.  
584 A network intervention that locates and intervenes with recently HIV-infected persons: The  
585 Transmission Reduction Intervention Project (TRIP). *Sci Rep.* 2016;6:38100.
- 586 43. Edgar RC. MUSCLE: multiple sequence alignment with high accuracy and high  
587 throughput. *Nucleic Acids Res.* 2004;32(5):1792-7.
- 588 44. Larsson A. AliView: a fast and lightweight alignment viewer and editor for large  
589 datasets. *Bioinformatics.* 2014;30(22):3276-8.
- 590 45. Bennett DE, Camacho RJ, Otelea D, Kuritzkes DR, Fleury H, Kiuchi M, et al. Drug  
591 resistance mutations for surveillance of transmitted HIV-1 drug-resistance: 2009 update. *PLoS*  
592 *One.* 2009;4(3):e4724.
- 593 46. Stamatakis A. RAxML version 8: a tool for phylogenetic analysis and post-analysis of  
594 large phylogenies. *Bioinformatics.* 2014;30(9):1312-3.
- 595 47. Ragonnet-Cronin M, Hodcroft E, Hue S, Fearnhill E, Delpech V, Brown AJ, et al.  
596 Automated analysis of phylogenetic clusters. *BMC Bioinformatics.* 2013;14:317.
- 597 48. Hassan AS, Pybus OG, Sanders EJ, Albert J, Esbjornsson J. Defining HIV-1  
598 transmission clusters based on sequence data. *AIDS.* 2017;31(9):1211-22.
- 599 49. Suchard MA, Lemey P, Baele G, Ayres DL, Drummond AJ, Rambaut A. Bayesian  
600 phylogenetic and phylodynamic data integration using BEAST 1.10. *Virus Evol.*  
601 2018;4(1):vey016.
- 602 50. Minin VN, Suchard MA. Counting labeled transitions in continuous-time Markov models  
603 of evolution. *J Math Biol.* 2008;56(3):391-412.  
604
